# Supplementary material for: Facile fabrication of a vanadium nitride/carbon fiber composite for half/full sodium-ion and potassium-ion batteries with long-term cycling performance
Source: Royal Society of Chemistry journal article supplement (doi:10.1039/c9nr10211f), 2020-01-01
Supplement: c9nr10211f1.pdf [file c9nr10211f1.pdf]

## Supporting Information

### Facile Fabrication of Vanadium Nitride/Carbon Fibers Composite for Half/Full Sodium-Ion and Potassium-Ion Batteries with Long-Term Cycling Performance

Lihong Xu<sup>‡a</sup>, Peixun Xiong<sup>‡b</sup>, Lingxing Zeng<sup>\*a,c</sup>, Renpin Liu<sup>a</sup>, Junbin Liu<sup>a</sup>, Fenqiang Luo<sup>a</sup>, Xinye Li<sup>a</sup>, Qinghua Chen<sup>a,d</sup>, Mingdeng Wei<sup>b</sup>, and Qingrong Qian<sup>\*a,c</sup>

<sup>a</sup> Engineering Research Center of Polymer Green Recycling of Ministry of Education, College of Environmental Science and Engineering, Fujian Normal University, Fuzhou, Fujian 350007, China. EMAIL: zenglingxing@fjnu.edu.cn; qrqian@fjnu.edu.cn; Tel: +86-591- 83465156

<sup>b</sup> Fujian Provincial Key Laboratory of Electrochemical Energy Storage Materials, Fuzhou University, Fuzhou, Fujian 350002, China.

<sup>c</sup> Fujian Key Laboratory of Pollution Control & Resource Reuse, Fuzhou, Fujian 350007, China.

<sup>d</sup> Fuqing Branch of Fujian Normal University, Fuqing, Fujian 350300, China.

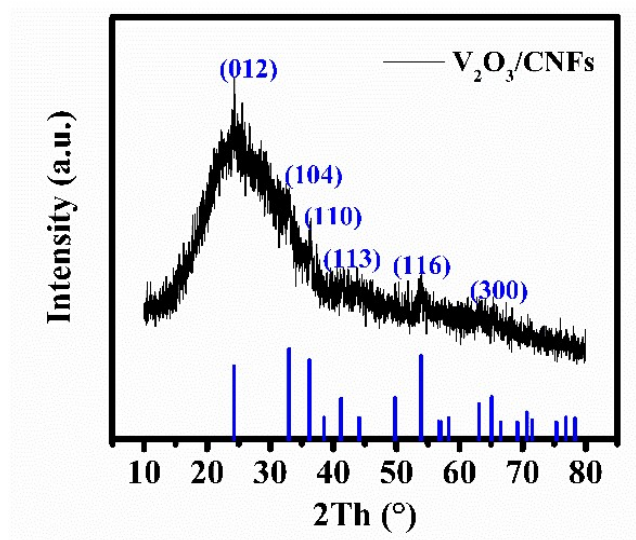

Fig. S1 XRD pattern of  $V_2O_3$ /CNFs composite.

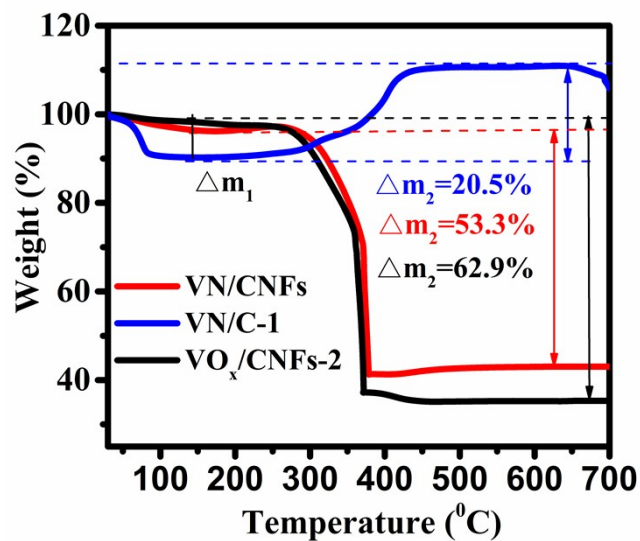

Fig. S2 TG curve of VN/CNFs, VN/C-1,  $VO_x$ /CNFs-2 composites.

**Table S1** Electrochemical performance comparison of the VN/CNFs with other V-based anode materials for SIBs/PIBs.

| Electrode Materials                      | Fields | Cycling capacity<br>(mAh g <sup>-1</sup> ) | Rate capability<br>(mAh g <sup>-1</sup> ) | Year/Ref. |
|------------------------------------------|--------|--------------------------------------------|-------------------------------------------|-----------|
| VN-QDs/CM                                | PIBs   | 228<br>(100cycles /0.1 A/g)                | 187<br>(1 A/g)                            | 2019/[S1] |
|                                          |        | 215<br>(500cycles /0.5 A/g)                |                                           |           |
| 2D-0D graphene-VN                        | SIBs   | 254<br>(800 cycles /1C)                    |                                           | 2017/[S2] |
| V <sub>2</sub> O <sub>3</sub> @PNCNFs    | PIBs   | ~230<br>(500 cycles /0.05A/g)              | 134<br>(1.0 A/g)                          | 2018/[S3] |
| V <sub>5</sub> S <sub>8</sub> nanosheets | PIBs   | 501<br>(100 cycles /0.05 A/g)              | 153<br>(10 A/g)                           | 2019/[S4] |
|                                          |        | 190<br>(1000 cycles /2 A/g)                |                                           |           |
| VS <sub>2</sub> nanosheets               | SIBs   | 620<br>(50 cycles /0.1 A/g)                | 277<br>(20 A/g)                           | 2018/[S5] |
| VSe <sub>2</sub> nanosheets              | PIBs   | 366<br>(200 cycles /0.1A/g)                | 169<br>(500 cycles /2 A/g)                | 2018/[S6] |
| FeVO <sub>4</sub> /C composite           | PIBs   | ~250<br>(2000 cycles /0.3 A/g)             | 180<br>(2 A/g)                            | 2019[S7]  |
|                                          |        |                                            |                                           |           |
| VN/CNFs                                  | SIBs   | 403<br>(100 cycles /0.1 A/g)               | 237<br>(4000 cycles /2 A/g)               | This work |
|                                          | PIBs   | 266<br>(200 cycles /0.1 A/g)               | 152<br>(1000 cycles /1 A/g)               |           |

**Ref.**

- [S1] H. Wu, Q. Yu, C.-Y. Lao, M. Qin, W. Wang, Z. Liu, C. Man, L. Wang, B. Jia and X. Qu, *Energy Storage Mater.*, 2019, **18**, 43-50.
- [S2] L. Wang, J. Sun, R. Song, S. Yang and H. Song, *Adv. Energy Mater.* 2016, **6**, 1502067.
- [S3] T. Jin, H. Li, Y. Li, L. Jiao and J. Chen, *Nano Energy* 2018, **50**, 462-467.
- [S4] L. Li, W. Zhang, X. Wang, S. Zhang, Y. Liu, M. Li, G. Zhu, Y. Zheng, Q. Zhang, T. Zhou, W. K. Pang, W. Luo, Z. Guo and J. Yang, *ACS Nano*, 2019, **13**, 7939-7948.
- [S5] J. Zhou, L. Wang, M. Yang, J. Wu, F. Chen, W. Huang, N. Han, H. Ye, F. Zhao, Y. Li and Y. Li, *Adv. Mater.*, 2017, **29**, 1702061.
- [S6] C. Yang, J. Feng, F. Lv, J. Zhou, C. Lin, K. Wang, Y. Zhang, Y. Yang, W. Wang, J. Li and S. Guo, *Adv. Mater.*, 2018, **30**, 1800036.
- [S7] X. Niu, Y. Zhang, L. Tan, Z. Yang, J. Yang, T. Liu, L. Zeng, Y. Zhu and L. Guo, *Energy Storage Mater.*, 2019, **22**, 160-167.

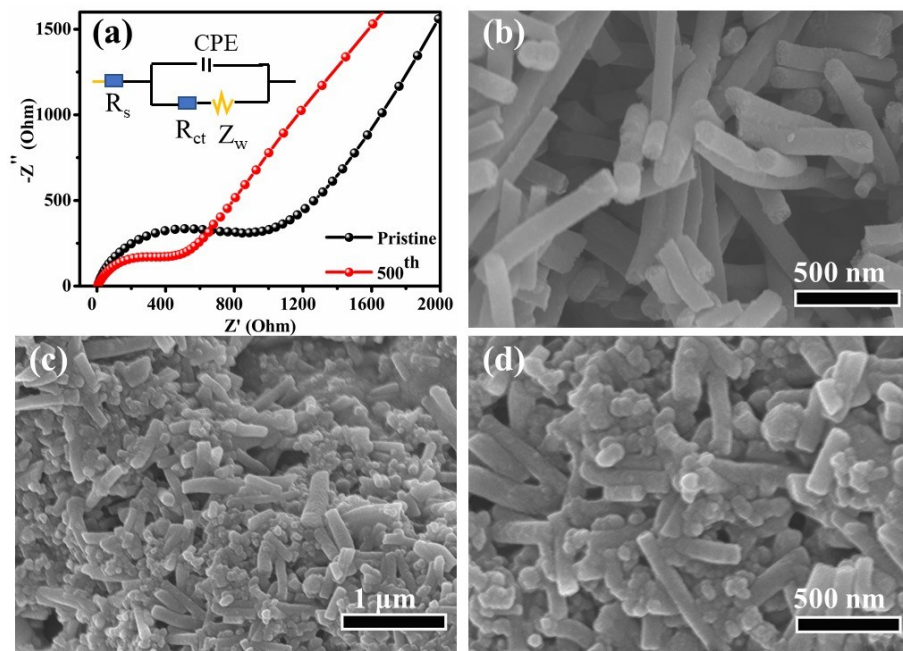

**Fig. S3** (a) Nyquist plots for the VN/CNFs before cycling and after 500 cycles. The SEM images of the electrodes (b) before cycling and (c-d) after 500 cycles at  $2 \text{ A g}^{-1}$  for SIBs.

**Table S2** Impedance parameters calculated from an equivalent circuit model.

| Sample            | $R_s$ ( $\Omega$ ) | $R_{ct}$ ( $\Omega$ ) |
|-------------------|--------------------|-----------------------|
| Pristine          | 6.9                | 1008.8                |
| 500 <sup>th</sup> | 4.8                | 625.4                 |

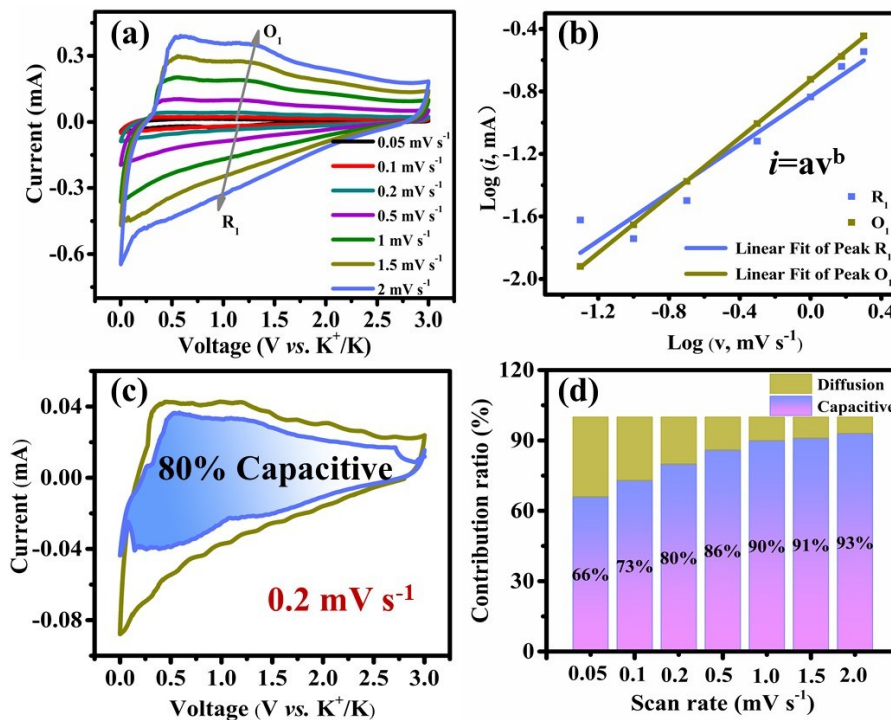

**Fig. S4** Surface-dominated behavior analysis in VN/CNFs electrode for PIBs: (a) Cyclic voltammograms at various scan rates of 0.05, 0.1, 0.2, 0.5, 1, 1.5 and 2.0 mV s<sup>-1</sup>; (b) b value determination; (c) Contribution of Capacitive (blue area) at 0.2 mV s<sup>-1</sup>; (d) Capacitive capacities (blue and purple mixed zone) and the diffusion controlled (brown) at different scan rates.

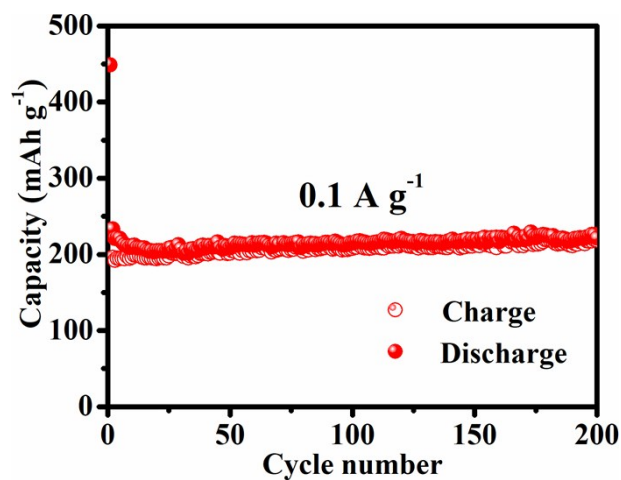

**Fig. S5** Cycling performance of pure CNF electrode at a current density of 0.1 A g<sup>-1</sup>.
